# Supplementary material for: Circular non-coding RNA ANRIL modulates ribosomal RNA maturation and atherosclerosis in humans
Source: PubMed Central journal article supplement (PMC4992165; doi:10.1038/ncomms12429), 2016-08-19
Supplement: ncomms12429-s1.pdf [file ncomms12429-s1.pdf]

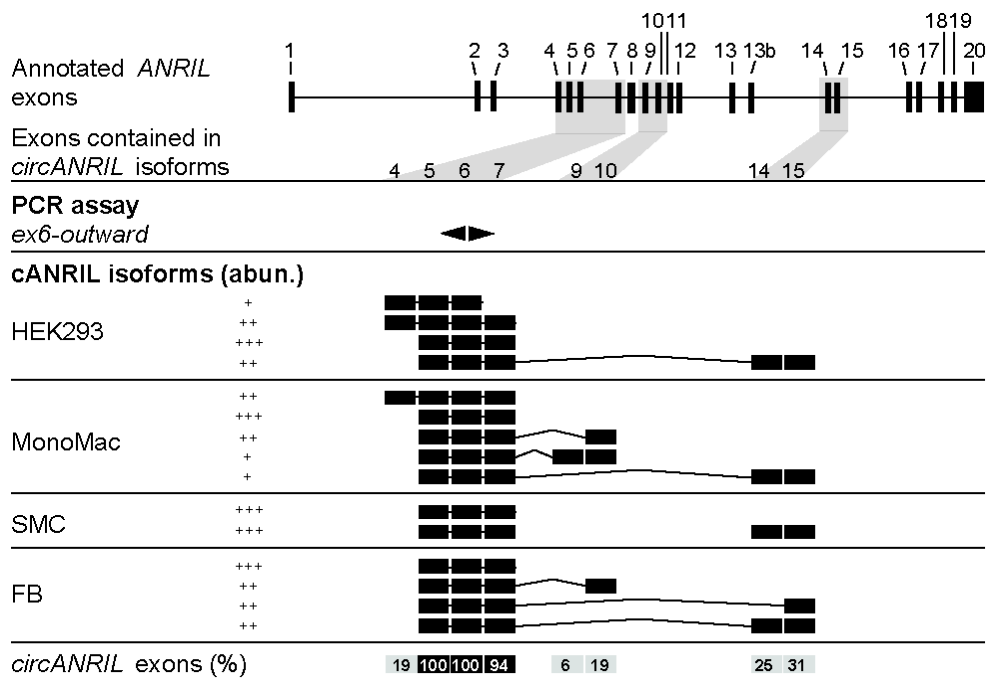

**Supplementary Figure 1.** Investigation of *circANRIL* transcript structure in human cell lines and primary cells. Annotated *ANRIL* exons and location of outward-facing PCR primers in exon 6. *CircANRIL* isoforms identified in human embryonic kidney cell line (HEK-293), human monocytic cell line (MonoMac), primary smooth muscle cells (SMC), and adventitial fibroblasts (FB). No exon scrambling except for back-splicing events was detected in *circANRIL* isoforms. abun. – abundance; ++ - at least two sequences, +++ - most abundant isoforms. *CircANRIL* consisting of exons 5, 6, 7, where exon 7 is back-spliced to exon 5, was the most abundant isoform detected in all investigated cells and was selected for functional studies.

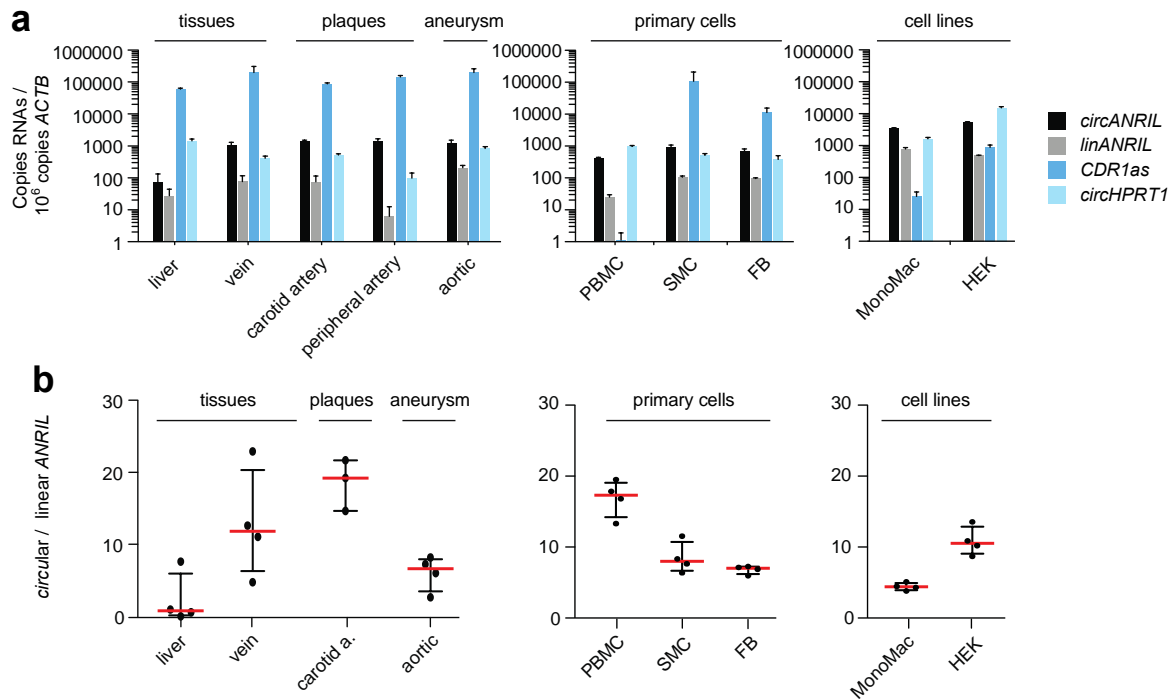

**Supplementary Figure 2.** RNA abundance of different circular RNAs in tissues and cells. **(a)** Copies of *circANRIL*, circular *CDR1as*, *circHPRT1*, and of linear *ANRIL* (*linANRIL*) RNA in human tissues, primary vascular cells, and cell lines normalized to  $10^6$  copies of housekeeping gene *ACTB*. Slight differences of *circANRIL* expression levels compared to Fig. 1b are explained by the use of a new batch of reverse-transcribed cDNAs. Peripheral blood mononuclear cells (PBMC), smooth muscle cells (SMC), adventitial fibroblasts (FB), human monocytic cell line MonoMac, human embryonic kidney cell line HEK-293. **(b)** Ratio of circular/linear *ANRIL* in tissues (left panel), primary cells (middle panel), and cell lines (right panel). Ratios were not calculated for plaques of peripheral arteries, for ECs, and for the THP1 cell line due to absence or very low expression of *linANRIL* in these samples. Red lines indicate median of ratios. Interquartile ranges are shown.

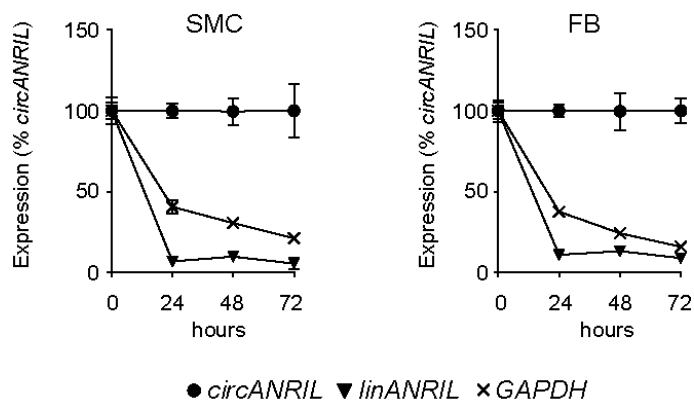

**Supplementary Figure 3.** *CircANRIL* is more stable than *linANRIL* in human primary cells. Half-lives of *circANRIL*, *linANRIL*, and of house-keeping *GAPDH* mRNA were determined in smooth muscle cells (SMC) and adventitial fibroblasts (FB) by qPCR analysis following inhibition of transcription with 50ng/ml actinomycin D. Analyses were performed in triplicates in RNA of 3 biological replicates. Data are given as mean  $\pm$  s.e.m.

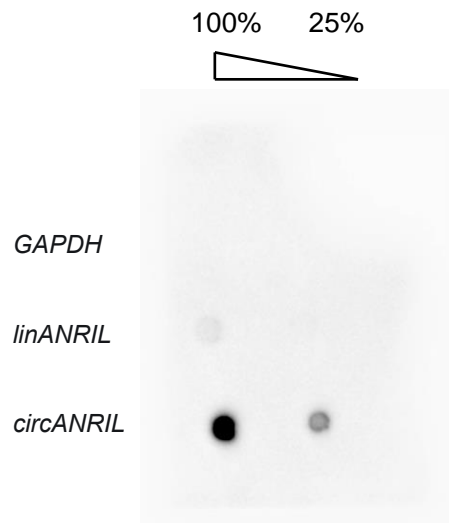

**Supplementary Figure 4.** Dot blot analysis of DIG-labeled probe that was subsequently used for *in situ* hybridization in Fig. 1c. RNAs for *GAPDH*, *linANRIL*, and *circANRIL* were spotted on a nylon membrane (*GAPDH*, *circANRIL* (line 1 5 fmol each) *linANRIL* (line 1 0,5 fmol resembling observed expression differences in Supplementary Fig. 2b)) and hybridized with the DIG-labeled probe.

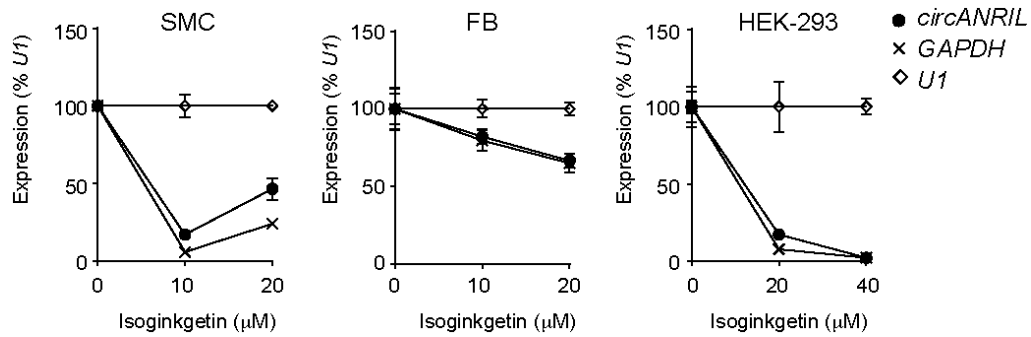

**Supplementary Figure 5.** Spliceosome-dependent generation of *circANRIL*. Reduced generation of *circANRIL* after incubation of smooth muscle cells (SMC), adventitial fibroblasts (FB) and HEK-293 cells with isoginkgetin, a general splicing inhibitor. Data were derived from quadruplicate measurements per condition. *U1* is not spliced and was used as reference RNA. *GAPDH* mRNA generation is known to be spliceosome-dependent.

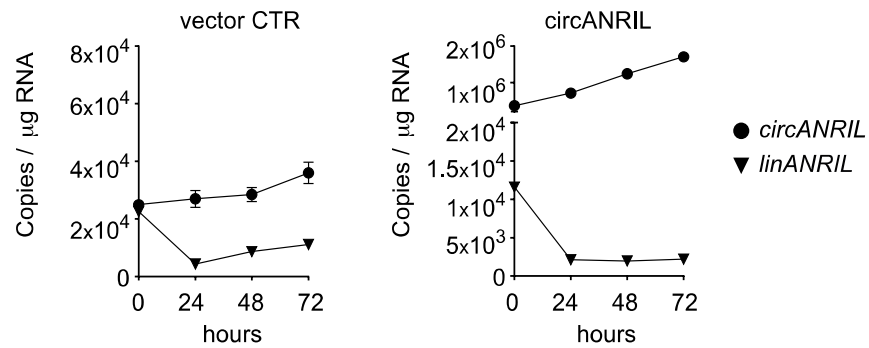

**Supplementary Figure 6.** *CircANRIL* is more stable than *linANRIL* in HEK-293 cells. Half-lives of *circANRIL* and of *linANRIL* were determined by qPCR analysis after inhibition of transcription with 50ng/ml actinomycin D in HEK-293 (left panel) or in HEK-293 cells overexpressing *circular* or *linear ANRIL*, respectively (right panel). Analyses were performed in triplicates in RNA of 3 biological replicates. Data are given as mean  $\pm$  s.e.m.

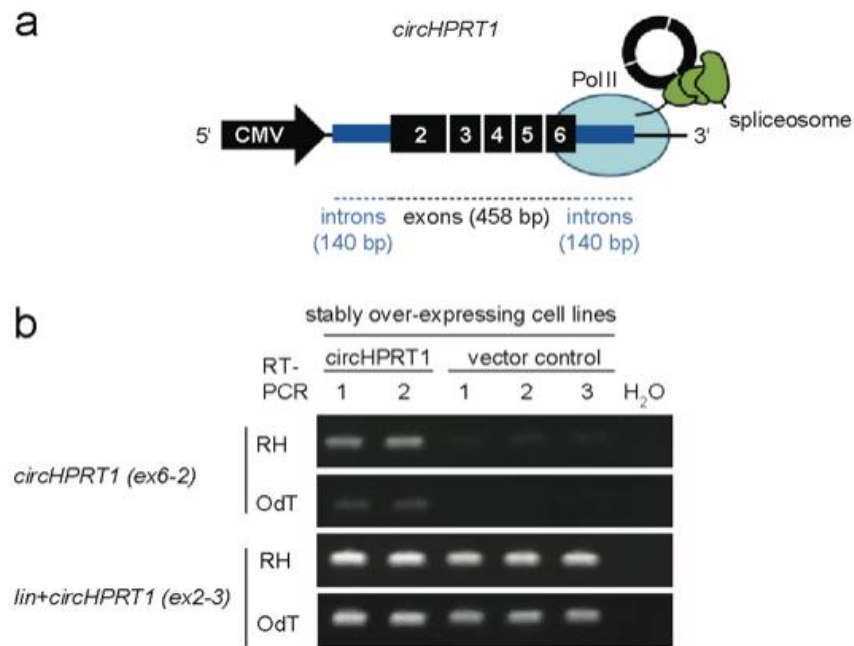

**Supplementary Figure 7.** Overexpression of *circHPRT1*. **(a)** Schematic of vector construct for expression of circular *HPRT1*. **(b)** Validation of *circHPRT1* overexpression by qPCR from random hexamer-primed (RH) or from oligo(d)T-primed (OdT) cDNA preparations. Results of biological replicates are shown on the agarose gel. Primer pair ex6-2 amplifies *HPRT1* RNA only after RNA circularization by back-splicing, primer pair ex2-3 recognizes both linear and circular *HPRT1* RNA.

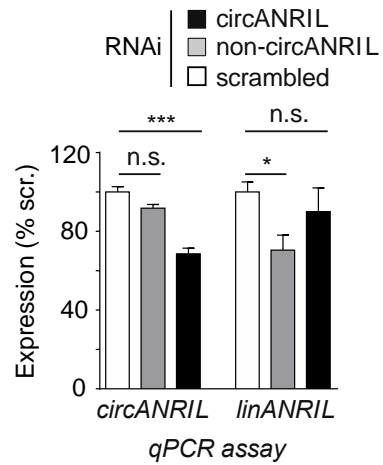

**Supplementary Figure 8.** Validation of linear or circular *ANRIL* siRNA-mediated down-regulation related to Fig. 2. qPCR Analysis was performed in quadruplicate measurements per condition. \*  $p < 0.05$ ; \*\*\*  $p < 0.001$ . Data are given mean  $\pm$  s.e.m.



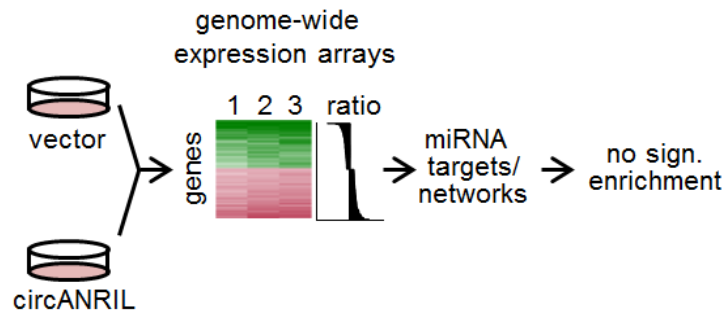

**Supplementary Figure 9.** Schematic of genome-wide expression analysis in *circANRIL* overexpressing (n=3) and vector control cells (n=3). Illumina HumanHT-12 v4 BeadChips were used for expression analyses. No significant regulation of miRNA-target gene networks was observed using the Ingenuity algorithm ([www.ingenuity.com](http://www.ingenuity.com)). Gene expression data have been deposited at Gene Expression Omnibus (GSE65392).

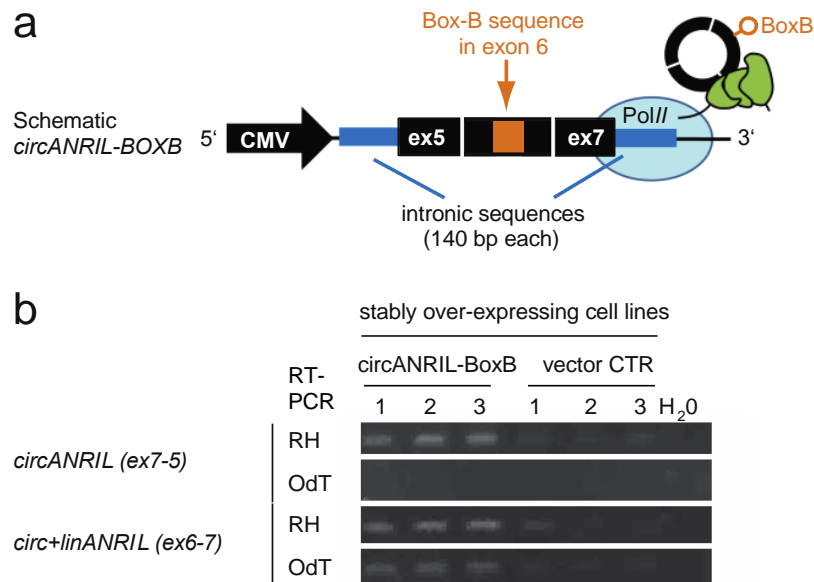

**Supplementary Figure 10.** Validation of *circANRIL* RNA containing BoxB RNA hairpin sequences. **(a)** Schematic of vector construct of *circANRIL* containing BoxB (*circANRIL-BoxB*). **(b)** Validation of *circANRIL-BoxB* overexpression by qPCR of random hexamer-primed (RH) or of oligo(d)T-primed (OdT) cDNA (3 biological replicates). Primer pair ex7-5 results in a PCR product only after RNA circularization by back-splicing, primer pair ex6-7 recognizes both linear and circular *ANRIL* RNA.

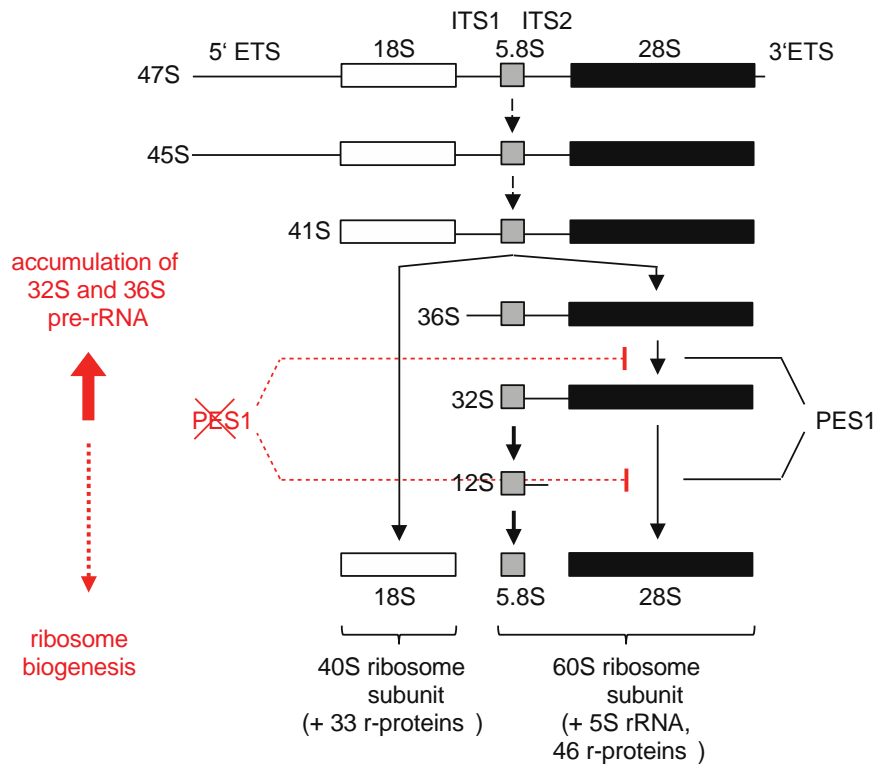

**Supplementary Figure 11.** Schematic of ribosomal RNA (rRNA) maturation and PES1 function. PES1 is required for 36S and 32S pre-rRNA processing to mature 5.8S and 28S rRNA. Impaired PES1 functions leads to accumulation of pre-rRNAs and reduced 60S ribosome biogenesis. ETS- external transcribed spacer; ITS- internal transcribed spacer.

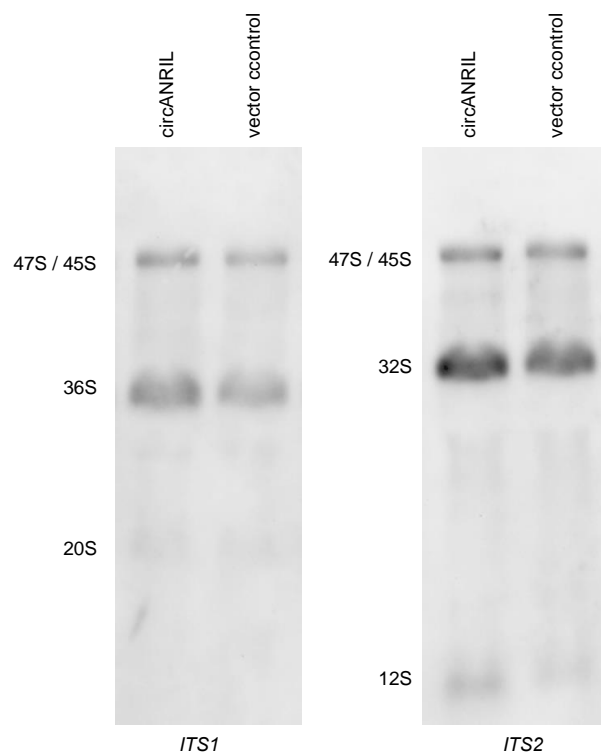

**Supplementary Figure 12.** Northern blotting in *circANRIL* overexpressing and vector control HEK-293 cell lines. *ITS1* and *ITS2* were used to detect pre-rRNA processing and pre-rRNA abundance in controls of following *circANRIL* RNA overexpression in HEK-293 cells.

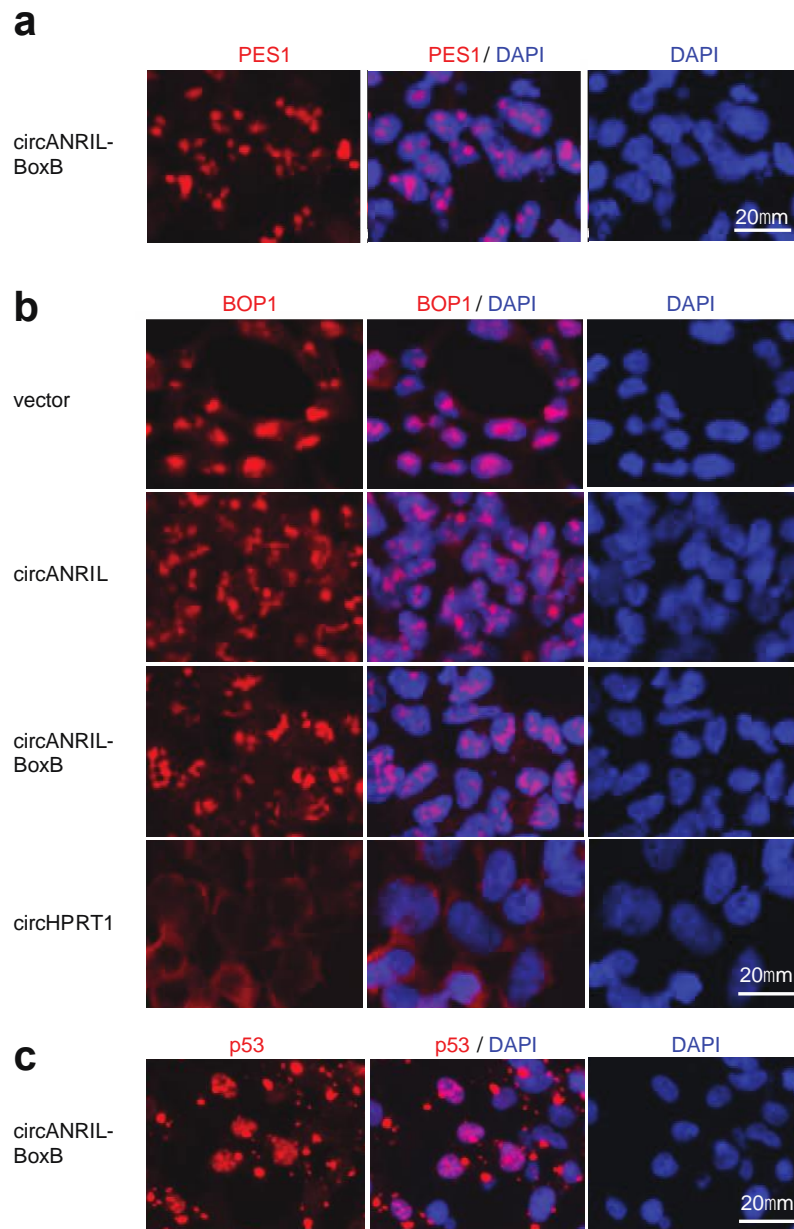

**Supplementary Figure 13.** Immunofluorescent stainings of PES1, BOP1, and p53 in *circANRIL* overexpressing and in control HEK-293 cells. **(a)** PES1 immunofluorescent staining in *circANRIL*-BoxB overexpressing cells corresponding to Fig. 6c. **(b)** BOP1 immunofluorescent staining in *circANRIL* overexpressing HEK-293 cells revealed altered nucleolar morphology. *circHPRT1* overexpression does not trigger nucleolar alterations. **(c)** p53 immunofluorescent staining in *circANRIL*-BoxB overexpressing HEK-293 cells corresponding to Fig. 6f.

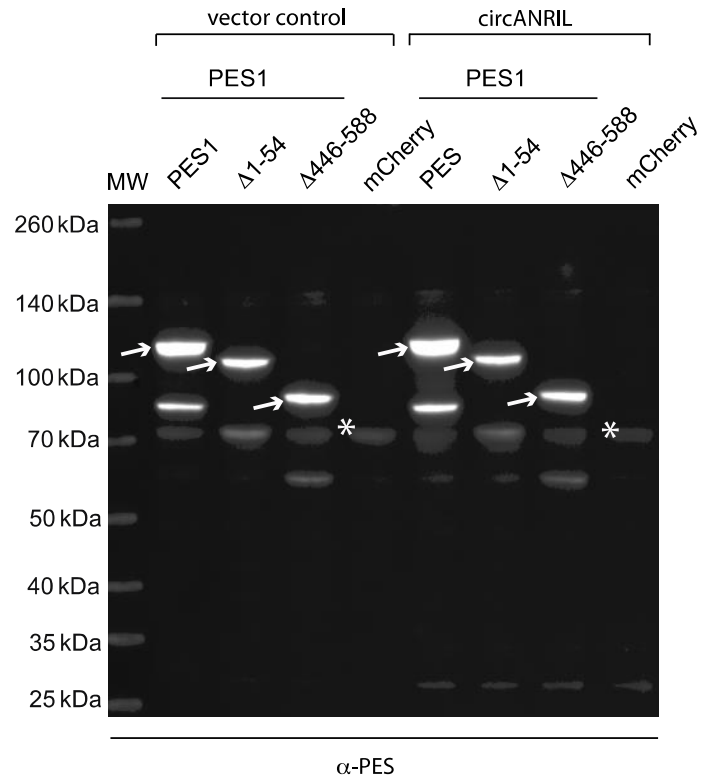

**Supplementary Figure 14.** Western Blot using PES1-specific antibody of protein extracts used for immunoprecipitation (IP) in Fig. 7e. The following constructs were expressed in HEK-293 cells: full length PES1 (PES1), the N-terminal deletion mutant lacking amino acids 1-54 ( $\Delta$ 1-54), the C-terminal deletion mutant lacking amino acids 446-588 ( $\Delta$ 446-588) or empty vector expressing mCherry alone. An asterisk indicates endogenous untagged PES1 protein.

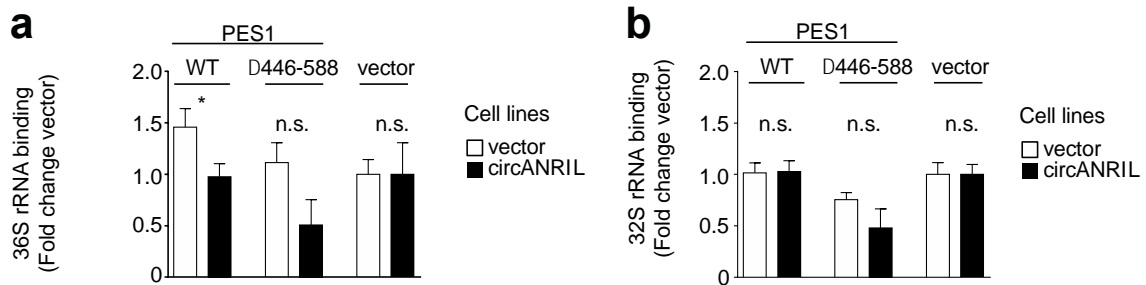

**Supplementary Figure 15.** Immunoprecipitation (IP) of PES1 isoforms and quantification of associated pre-rRNA by qPCR **(a)** 36S pre-rRNA binding to full length PES1 (PES1-WT) is significantly reduced when *circANRIL* is overexpressed. **(b)** 32S pre-rRNA binding to PES1 is not reduced by *circANRIL* overexpression. IP was performed in a pool of 3 biological replicates, qPCR measurements were performed in quadruplicates.

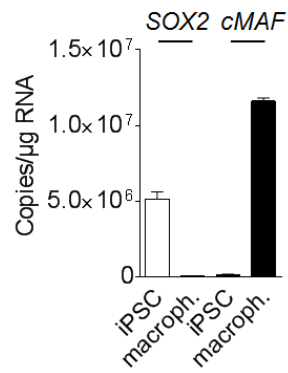

**Supplementary Figure 16.** Quantification of iPSC marker *SOX2* and macrophage differentiation marker *cMAF* in iPSC and iPSC-derived macrophages (macroph.) related to Fig. 8. Analysis was performed in quadruplicate measurements per condition. Data are given mean  $\pm$  s.e.m.



**a**

Figure 2b, source data

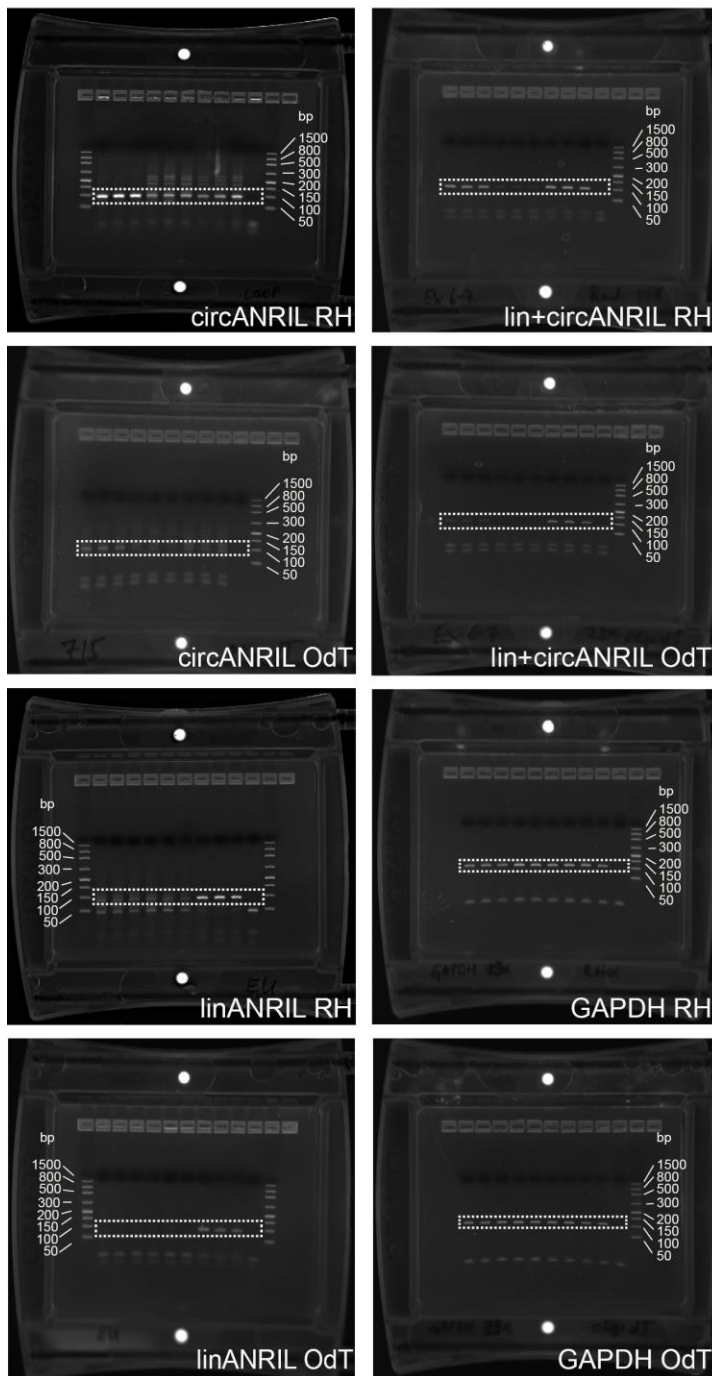**b**

Figure 3b, source data

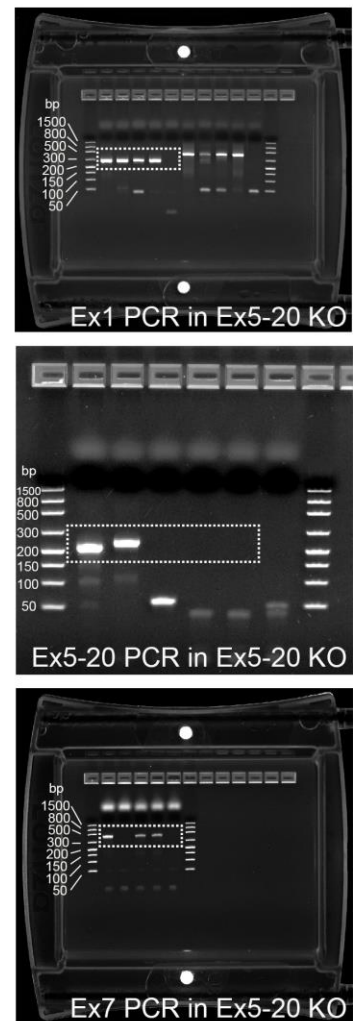

**Supplementary Figure 17.** Uncropped scans of DNA agarose gels used in Figures 2b and 3b. Regions that were selected for assembling the figures are indicated with dotted squares. Molecular size marker in base pairs (bp).

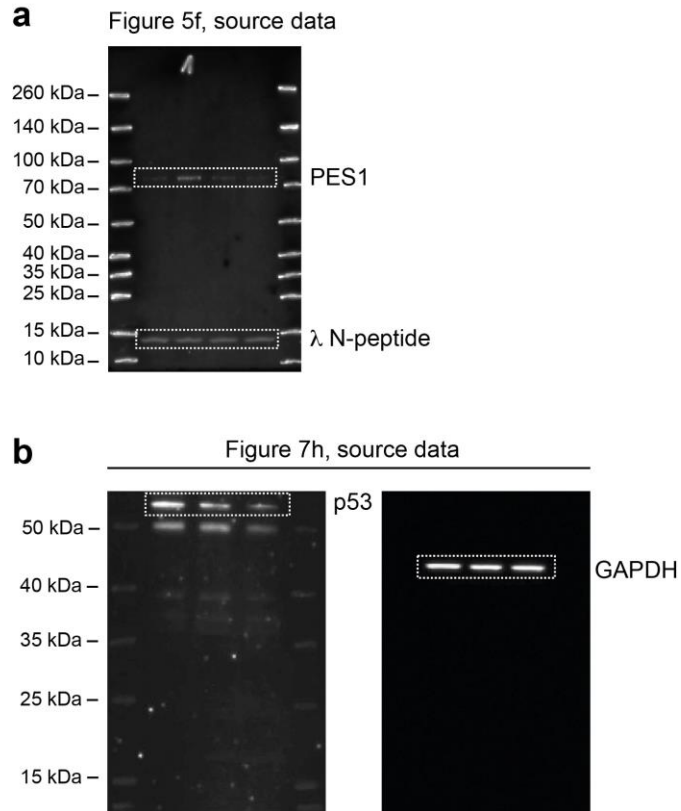

**Supplementary Figure 18.** Uncropped scans of Western blots used in Figures 5f and 7h. Regions that were selected for assembling the figures are indicated with dotted squares. The GAPDH blot was stripped and re-probed. Molecular weight marker in kilodaltons (kDa).

## SUPPLEMENTARY TABLES

**Supplementary Table 1.** Plasmid sequences for circular RNA and BoxB overexpression.

---

>*circANRIL(ex5-6-7)*, 689 bp without restriction sites, 409 bp exonic sequence

---

GAAATTCGCGGCCGC CAATGTATTTCTCTGCTTCATACACTATCCAAGGTGATAAAAAGTGTTTATGAAGAG  
GGATTAGGAAATATCTGCTGTGTTTAGGTCATAGTCCAACCAAAGGATTAATTAACATTTGCCTCTTTTT  
TCTCCTACATCCAGTGTCCCTTTTGTATGAGAAGAATAAGCCTCATTCTGATTCAACAGCAGAGATCAAAG  
AAAAGACTTCTGTTTTCTGGCCACCAGATATATGTTATCTGTGCTTAAAGAAATGAAAAACACACATCAA  
AGGAGAAATTTCTTGAAAGAGAGGGTTCAAGCATCACTGTTAGGTGTGCTGGAATCCTTTCCCGAGTCA  
GTACTGCTTTCTAGAAAAACC GGGGAGATCTATTTGGAATGTATCTAACTCCAAAGAAACCATCAGAG  
GTAACAGTAGAGACGGGGTTTACCATGTTGGCCAGACTGGTCTTGAAC TCCCGACCTCGTGATTGCGCC  
GCCTCGGCC TCCCAAAGTGTGGGATTACAGGTGTGAGACACCACGCCCGGCGGATAGAGAGAATTTTGA  
CAGGTGAGGAGGTATTCCAATGCAAAAAGAATAATAGGAGCAAAAGCACAGTGGTGAGAAAATTGGAGGGGA  
ACTGTGAAAATTGCCACATAGATTAGAGGCAGGAAAATAAAGGACGGCTAAGTTTATATAGTGAACAGTG  
AGCAAGCTTGAATTC

---

>*circANRIL-BoxB*, 928 bp without restriction sites, 648 bp exonic sequence incl. BoxB

---

GAAATTCGCGGCCGC CAATGTATTTCTCTGCTTCATACACTATCCAAGGTGATAAAAAGTGTTTATGAAGAG  
GGATTAGGAAATATCTGCTGTGTTTAGGTCATAGTCCAACCAAAGGATTAATTAACATTTGCCTCTTTTT  
TCTCCTACATCCAGTGTCCCTTTTGTATGAGAAGAATAAGCCTCATTCTGATTCAACAGCAGAGATCAAAG  
AAAAGACTTCTGTTTTCTGGCCACCAGATATATGTTATCTGTGCTTAAAGAAATGAAAAACACACATCAA  
AGGAGAAATTTCTTGAAAGAGAGGGTTCAAGCATCACTGTTAGGTGTGCTGGAATCCTTTCCATGGCAC  
CATGTGGAATTC TCCGAAAGCTTTTCGCGACTCGAGACTAGTTCTAGATGATCACCCGAGGGGCCCTGAA  
GAAGGGCCCTCGACTAAGTCCAAC TACTAACTGGGGCCCTGAAGAAGGGCCCATATAGGGCCCTGAAGA  
AGGGCCCTATCGAGGATATTTCTCGACTAAGTCCAAC TACTAACTGGGGCCCTGAAGAAGGGCCCATAT  
AGGGCCCTGAAGAAGGGCCCTCCGAGT CAGTACTGCTTTCTAGAAAGAAAACC GGGGAGATCTATTTGGAA  
TGTATCTAACTCCAAAGAAACCATCAGAGGTAACAGTAGAGACGGGGTTTACCATGTTGGCCAGACTGG  
TCTTGAAC TCCCGACCTCGTGATTGCGCCCGCTCGGCC TCCCAAAGTGTGGGATTACAGGTGTGAGACA  
CCACGCCCGCGGATAGAGAGAATTTTGACAGGTGAGGAGGTATTCCAATGCAAAAAGAATAATAGGAGCA  
AAAGCACAGTGGTGAGAAAATTGGAGGGGA ACTGTGAAAATTGCCACATAGATTAGAGGCAGGAAAATAAA  
GGACGGCTAAGTTTATATAGTGAACAGTGAGCAAGCTTGAATTC

---

>*BoxB*, 170 bp without restriction sites

---

AAGCTTGGGCCCTGAAGAAGGGCCCTCGACTAAGTCCAAC TACTAACTGGGGCCCTGAAGAAGGGCCCA  
TATAGGGCCCTGAAGAAGGGCCCTATCGAGGATATTTCTCGACTAAGTCCAAC TACTAACTGGGGCCCT  
GAAGAAGGGCCCATATAGGGCCCTGAAGAAGGGCCCTCGAC AAGCTT

---

>*circHPRT1(ex2-3-4-5-6)*, 738 bp without restriction sites, 458 bp exonic sequence

---

GAAATTCGCGGCCGC ACCTACAAAGTTAACAGTTACTAATATCATCTTACACCTAAATTTCTCTGATAGAC  
TAAGGTTATTTTTTAACATCTTAATCCAATCAAATGTTTGTATCCTGTAATGCTCTCATTGAAACAGCTA  
TATTTCTTTTTCAGATTAGTGATGATGAACCAGGTTATGACCTTGATTTATTTTGCATACCTAATCATT  
TGCTGAGGATTTGGAAAGGGTGTTTATTCTCATGGACTAATTTATGGACAGGACTGAACGCTCTTGCTCGA  
GATGTGATGAAGGAGATGGGAGGCCATCACATTGTAGCCCTCTGTGTGCTCAAGGGGGGCTATAAAATCT  
TTGCTGACCTGCTGGATTACATCAAAGCACTGAATAGAAAAGTGTGATAGATCCATTCCATGACTGTAGA  
TTTTATCAGACTGAAGAGCTATTGTAATGACCAGTCAACAGGGGACATAAAAAGTAAATGGTGGAGATGAT  
CTCTCAACTTTAACTGGAAAAGATGCTTTGATTGTGGAAGATATAAATGACACTGGCAAAAACAATGCAGA  
CTTTGCTTTTCCCTGGT CAGGCAGTATAATCCAAGATGGTCAAGGTCGCAAGGTATGTATGACATTTTGA  
CACAGAATATTTTCTCATTGAAGGGGGATTAAGTGATTGCTTCTTTTAAAGGATAAATGTTTTCAACT  
GTCATTTTATCTTCGAAAAGTAATGTAATCTCATATAAGACTTAAGATATAA AAGCTTGAATTC

---

DNA sequences for overexpression of circular RNA were cloned into the bicistronic pBI-CMV2 vector (Clontech). GAATTC (dark blue)- EcoRI restriction site, GCGGCCGC (grey) – NotI restriction site, AAGCTT (light blue)- HindIII restriction site, ACGTGGACGT- exonic sequence, exon-exon boundary, ACGT- intronic sequence, ACGT- BoxB sequence.

**Supplementary Table 2.** Sequence validation of ANRIL genomic knockout in HEK-293 cells. Related to Figure 3.

---

*>9p21 heterozygous knockout cell line, 202 bp PCR product*

---

GGCAGGAGGATCTGGGGCATATGTTTAAATCAGGCATTGGCATCTGTACTAGAATTGAAAGGTGGAAC  
TTATTGTGTTCTATTTATTGAGTATAGGTATACCATATACTATAAGTATAGGTATAGTATACCATACCT  
TAGAGGTTGCTCAAAAAGAAACACAAAATATATCCTCTTTTAAGGATCCTGATGCTTTGCTC

---

*>9p21 homozygous knockout cell line, 226 bp PCR product*

---

GGCAGGAGGATCTGGGGCATATGTTTAAATCAGGCATTGGCATCTGTACTAGAATTGAAAGGTGGAAC  
TTATTGTGTTCTATTTATTGAGTATAGGTATACCATATACTATAAGTATAGGTATAGTATACCATACCT  
TGGCAAGGGTGTGGGTAGATGGGTAGAGGTTGCTCAAAAAGAAACACAAAATATATCCTCTTTTAAGGA  
TCCTGATGCTTTGCTC

---

DNA sequences from HEK-293 cell lines with heterozygous or homozygous knockout of 9p21 region. ACGTACGT - genomic sequence, ACGTACGT - primers (see also Supplementary Table 7).

**Supplementary Table 3.** *circANRIL*-bound proteins identified by label-free mass-spectrometric quantification (LFQ).

| <b>Proteins</b> | <b>MS/MS<br/>Count</b> | <b>LFQ<br/>circANRIL+BoxB<br/>(log intensity)</b> | <b>LFQ<br/>circANRIL<br/>(log intensity)</b> | <b>Difference -log(p)*<br/>(Δlog)</b> |      |
|-----------------|------------------------|---------------------------------------------------|----------------------------------------------|---------------------------------------|------|
| NOP14           | 145                    | 29.07                                             | 26.86                                        | 2.21                                  | 2.09 |
| PES1            | 117                    | 28.03                                             | 25.99                                        | 2.04                                  | 1.38 |
| SDAD1           | 27                     | 28.10                                             | 26.52                                        | 1.58                                  | 1.61 |
| LYAR            | 372                    | 26.95                                             | 25.66                                        | 1.29                                  | 1.67 |
| EIF1AX;EIF1AY   | 19                     | 27.85                                             | 26.67                                        | 1.18                                  | 2.36 |
| NOLC1           | 338                    | 30.32                                             | 29.18                                        | 1.14                                  | 2.85 |
| FRG1;FRG1B      | 57                     | 28.07                                             | 26.94                                        | 1.12                                  | 1.44 |
| DDX54           | 203                    | 26.13                                             | 25.08                                        | 1.05                                  | 1.48 |
| BMS1            | 159                    | 26.85                                             | 25.92                                        | 0.93                                  | 2.00 |
| SURF6           | 219                    | 26.89                                             | 26.01                                        | 0.88                                  | 1.41 |
| ARL6IP4         | 218                    | 32.07                                             | 31.19                                        | 0.88                                  | 2.95 |
| RFC1            | 68                     | 31.50                                             | 30.63                                        | 0.87                                  | 2.74 |
| NAT10           | 356                    | 30.25                                             | 29.40                                        | 0.86                                  | 1.36 |
| NOM1            | 121                    | 28.78                                             | 27.95                                        | 0.83                                  | 2.16 |
| SLC16A1         | 35                     | 28.30                                             | 27.48                                        | 0.82                                  | 1.33 |
| MAZ             | 52                     | 28.43                                             | 27.63                                        | 0.81                                  | 2.88 |
| AKAP17A         | 232                    | 28.44                                             | 27.66                                        | 0.78                                  | 1.53 |
| UBTF            | 172                    | 29.59                                             | 28.85                                        | 0.74                                  | 2.16 |
| SF3B2           | 82                     | 28.67                                             | 27.96                                        | 0.71                                  | 2.30 |
| RPL22           | 94                     | 30.25                                             | 29.67                                        | 0.58                                  | 2.92 |
| HSPA8           | 339                    | 30.42                                             | 29.90                                        | 0.53                                  | 2.93 |
| THRAP3          | 290                    | 30.19                                             | 29.68                                        | 0.51                                  | 1.51 |
| RRP1            | 143                    | 29.63                                             | 29.13                                        | 0.50                                  | 2.18 |
| RPL36A          | 84                     | 30.66                                             | 30.18                                        | 0.48                                  | 1.43 |
| PRPF38B         | 131                    | 29.11                                             | 28.65                                        | 0.47                                  | 2.26 |
| ESF1            | 112                    | 28.19                                             | 27.73                                        | 0.46                                  | 2.34 |
| PRPF40A         | 320                    | 30.94                                             | 30.49                                        | 0.45                                  | 1.89 |
| PGAM5           | 170                    | 30.90                                             | 30.46                                        | 0.43                                  | 1.76 |
| RPL19           | 241                    | 32.77                                             | 32.35                                        | 0.42                                  | 1.82 |
| PRPF3           | 164                    | 29.44                                             | 29.07                                        | 0.37                                  | 2.29 |
| ZNF512          | 88                     | 28.24                                             | 27.88                                        | 0.36                                  | 1.37 |
| RPL13           | 301                    | 32.50                                             | 32.23                                        | 0.26                                  | 2.09 |
| NOP14           | 145                    | 29.07                                             | 26.86                                        | 2.21                                  | 2.09 |
| HADHB           | 24                     | 28,12                                             | 25,93                                        | 2.04                                  | 1.38 |

\* proteins with significant binding ( $p < 0.05$ ; e.g.  $(-\log(p) > 1.3)$  are given.

**Supplementary Table 4** *De novo* translated proteins in *circANRIL* overexpressing compared to vector control (CTR) HEK-293 cells.

| <b>Gene name</b> | <b>Protein name</b>                                                                                                 | <b>Ratio 48h/24h<br/>(circANRIL/CTR)</b> |
|------------------|---------------------------------------------------------------------------------------------------------------------|------------------------------------------|
| SNRPD1           | Small nuclear ribonucleoprotein Sm D1                                                                               | -1.56                                    |
| EPPK1            | Epiplakin                                                                                                           | -1.41                                    |
| EIF1;EIF1B       | Eukaryotic translation initiation factor 1;Eukaryotic translation initiation factor 1b                              | -1.41                                    |
| CARM1            | Histone-arginine methyltransferase CARM1                                                                            | -1.40                                    |
| HSPA4L           | Heat shock 70 kDa protein 4L                                                                                        | -1.37                                    |
| TBCE             | Tubulin-specific chaperone E                                                                                        | -1.35                                    |
| CNOT1            | CCR4-NOT transcription complex subunit 1                                                                            | -1.34                                    |
| KPNA2            | Importin subunit alpha-1                                                                                            | -1.33                                    |
| AIMP1            | Aminoacyl tRNA synthase complex-interacting multifunctional protein 1;Endothelial monocyte-activating polypeptide 2 | -1.32                                    |
| BOP1;KM-PA-2     | Ribosome biogenesis protein BOP1                                                                                    | -1.32                                    |
| PSIP1            | PC4 and SFRS1-interacting protein                                                                                   | -1.32                                    |
| GCLM             | Glutamate--cysteine ligase regulatory subunit                                                                       | -1.28                                    |
| HEATR1           | HEAT repeat-containing protein 1                                                                                    | -1.28                                    |
| TRMT112          | tRNA methyltransferase 112 homolog                                                                                  | -1.27                                    |
| THOC2            | THO complex subunit 2                                                                                               | -1.26                                    |
| CBX5             | Chromobox protein homolog 5                                                                                         | -1.26                                    |
| PPIH             | Peptidyl-prolyl cis-trans isomerase H;Peptidyl-prolyl cis-trans isomerase                                           | -1.26                                    |
| IMPDH1           | Inosine-5-monophosphate dehydrogenase 1;Inosine-5-monophosphate dehydrogenase                                       | -1.26                                    |
| TIAL1            | Nucleolysin TIAR                                                                                                    | -1.26                                    |
| EIF4G2           | Eukaryotic translation initiation factor 4 gamma 2                                                                  | -1.26                                    |
| NOP56            | Nucleolar protein 56                                                                                                | -1.25                                    |
| KRR1             | KRR1 small subunit processome component homolog                                                                     | -1.23                                    |
| DKC1             | H/ACA ribonucleoprotein complex subunit 4                                                                           | -1.22                                    |
| HSPA14           | Heat shock 70 kDa protein 14                                                                                        | -1.22                                    |
| EIF5             | Eukaryotic translation initiation factor 5                                                                          | -1.21                                    |
| ARPC1A           | Actin-related protein 2/3 complex subunit 1A                                                                        | -1.21                                    |
| MRPL38           | 39S ribosomal protein L38, mitochondrial                                                                            | -1.21                                    |
| H2AFY2           | Core histone macro-H2A.2                                                                                            | -1.20                                    |
| TOP2A            | DNA topoisomerase 2-alpha                                                                                           | -1.20                                    |
| VPS29            | Vacuolar protein sorting-associated protein 29                                                                      | -1.20                                    |
| CDV3             | Protein CDV3 homolog                                                                                                | -1.20                                    |
| SCAF4            | Splicing factor, arginine/serine-rich 15                                                                            | -1.19                                    |
| CFL2             | Cofilin-2                                                                                                           | -1.19                                    |
| NUP93            | Nuclear pore complex protein Nup93                                                                                  | -1.19                                    |
| PPIF             | Peptidyl-prolyl cis-trans isomerase F, mitochondrial                                                                | -1.19                                    |
| RPL35            | 60S ribosomal protein L35                                                                                           | -1.19                                    |
| SKIV2L2          | Superkiller viralicidic activity 2-like 2                                                                           | -1.19                                    |
| DNAJC8           | DnaJ homolog subfamily C member 8                                                                                   | -1.19                                    |

|                |                                                         |       |
|----------------|---------------------------------------------------------|-------|
| UGDH           | UDP-glucose 6-dehydrogenase                             | -1.18 |
| HUWE1          | E3 ubiquitin-protein ligase HUWE1                       | -1.18 |
| EEF1A2         | Elongation factor 1-alpha 2                             | -1.18 |
| TOP1           | DNA topoisomerase 1                                     | -1.18 |
| EMD            | Emerin                                                  | -1.18 |
|                | Methionine aminopeptidase 2;Methionine                  |       |
| METAP2         | aminopeptidase                                          | -1.18 |
| DIABLO         | Diablo homolog, mitochondrial                           | -1.17 |
| WBP11          | WW domain-binding protein 11                            | -1.17 |
|                | Actin, alpha skeletal muscle;Actin, alpha cardiac       |       |
| ACTA1;ACTC1;   | muscle 1;Actin, gamma-enteric smooth muscle;Actin,      | -1.17 |
| ACTG2;ACTA2    | aortic smooth muscle                                    |       |
| RFC5           | Replication factor C subunit 5                          | -1.17 |
| KPNA1          | Importin subunit alpha-5                                | -1.17 |
| RRP1B          | Ribosomal RNA processing protein 1 homolog B            | -1.16 |
|                | Protein kinase C and casein kinase substrate in neurons |       |
| PACSIN2        | protein 2                                               | -1.16 |
| PPA2           | Inorganic pyrophosphatase 2, mitochondrial              | -1.16 |
| DDX23          | Probable ATP-dependent RNA helicase DDX23               | -1.16 |
| DRG1           | Developmentally-regulated GTP-binding protein 1         | -1.16 |
| PPP1R2;PPP1R2  | Protein phosphatase inhibitor 2;Putative protein        | -1.16 |
| P3             | phosphatase inhibitor 2-like protein 3                  |       |
| CBX3           | Chromobox protein homolog 3                             | -1.16 |
| TPR            | Nucleoprotein TPR                                       | -1.16 |
|                | Eukaryotic translation initiation factor 2 subunit      |       |
|                | 3;Putative eukaryotic translation initiation factor 2   | -1.15 |
| EIF2S3;EIF2S3L | subunit 3-like protein                                  |       |
| RRP12          | RRP12-like protein                                      | -1.15 |
| EIF3K          | Eukaryotic translation initiation factor 3 subunit K    | -1.15 |
| PLEC           | Plectin                                                 | -1.15 |
| NUP205         | Nuclear pore complex protein Nup205                     | -1.15 |
| SCFD1          | Sec1 family domain-containing protein 1                 | -1.15 |
| SNRPA1         | U2 small nuclear ribonucleoprotein A                    | -1.15 |
| AKAP12         | A-kinase anchor protein 12                              | -1.15 |
|                | Basic leucine zipper and W2 domain-containing protein   |       |
| BZW2           | 2                                                       | -1.15 |
| EIF4G1         | Eukaryotic translation initiation factor 4 gamma 1      | -1.15 |
| PRPF6          | Pre-mRNA-processing factor 6                            | -1.14 |
|                | Basic leucine zipper and W2 domain-containing protein   |       |
| BZW1           | 1                                                       | -1.14 |
| MST4           | Serine/threonine-protein kinase MST4                    | -1.14 |
|                | NHP2-like protein 1;NHP2-like protein 1, N-terminally   |       |
| NHP2L1         | processed                                               | -1.14 |
| RPL29          | 60S ribosomal protein L29                               | -1.14 |
| GDI1           | Rab GDP dissociation inhibitor alpha                    | -1.13 |
| HSP90AB1       | Heat shock protein HSP 90-beta                          | -1.13 |
| SNRPD2         | Small nuclear ribonucleoprotein Sm D2                   | -1.13 |
| DFFA           | DNA fragmentation factor subunit alpha                  | -1.13 |



|              |                                                        |       |
|--------------|--------------------------------------------------------|-------|
| NUTF2        | Nuclear transport factor 2                             | -1.13 |
| SUPT5H       | Transcription elongation factor SPT5                   | -1.13 |
| ENO2         | Gamma-enolase;Enolase                                  | -1.13 |
|              | Glutamine--fructose-6-phosphate aminotransferase       | -1.13 |
| GFPT1        | [isomerizing] 1                                        | -1.13 |
| RPL30        | 60S ribosomal protein L30                              | -1.13 |
| MTPN         | Myotrophin                                             | -1.13 |
| EIF3D        | Eukaryotic translation initiation factor 3 subunit D   | -1.13 |
| UBQLN2       | Ubiquilin-2                                            | -1.12 |
| RBM39        | RNA-binding protein 39                                 | -1.12 |
| VCL          | Vinculin                                               | -1.12 |
| DIS3         | Exosome complex exonuclease RRP44                      | -1.12 |
| IPO9         | Importin-9                                             | -1.12 |
| SRRT         | Serrate RNA effector molecule homolog                  | -1.12 |
| COPE         | Coatomer subunit epsilon                               | -1.12 |
| U2AF2        | Splicing factor U2AF 65 kDa subunit                    | -1.12 |
| MLEC         | Malectin                                               | -1.12 |
| RPS20        | 40S ribosomal protein S20                              | -1.12 |
|              | Ribose-phosphate pyrophosphokinase 1;Ribose-           | -1.12 |
| PRPS1        | phosphate pyrophosphokinase                            | -1.12 |
| SNRNP70      | U1 small nuclear ribonucleoprotein 70 kDa              | -1.12 |
| MTA2;DKFZp68 |                                                        | -1.12 |
| 6F2281       | Metastasis-associated protein MTA2                     | -1.12 |
| GFM1         | Elongation factor G, mitochondrial                     | -1.12 |
|              | Mitochondrial import receptor subunit TOM22            | -1.12 |
| TOMM22       | homolog                                                | -1.12 |
|              | Lamina-associated polypeptide 2, isoform               | -1.12 |
| TMPO         | alpha;Thymopoietin;Thymopentin                         | -1.12 |
| PSME3        | Proteasome activator complex subunit 3                 | -1.11 |
| RRS1         | Ribosome biogenesis regulatory protein homolog         | -1.11 |
|              | Deoxyuridine 5-triphosphate nucleotidohydrolase,       | -1.11 |
| DUT          | mitochondrial                                          | -1.11 |
| UCHL5        | Ubiquitin carboxyl-terminal hydrolase isozyme L5       | -1.11 |
|              | Barrier-to-autointegration factor;Barrier-to-          | 1.10  |
| BANF1        | autointegration factor, N-terminally processed         | 1.10  |
| CLTB         | Clathrin light chain B                                 | 1.10  |
| VPS35        | Vacuolar protein sorting-associated protein 35         | 1.10  |
|              | Malate dehydrogenase, cytoplasmic;Malate               | 1.10  |
| MDH1         | dehydrogenase                                          | 1.10  |
| TSN          | Translin                                               | 1.11  |
| DNM2         | Dynamin-2                                              | 1.11  |
| SKP1         | S-phase kinase-associated protein 1                    | 1.11  |
| TTLL12       | Tubulin--tyrosine ligase-like protein 12               | 1.11  |
|              | Platelet-activating factor acetylhydrolase IB subunit  | 1.11  |
| PAFAH1B3     | gamma                                                  | 1.11  |
| PSMB5        | Proteasome subunit beta type-5                         | 1.11  |
| ANXA7        | Annexin A7;Annexin                                     | 1.11  |
| HNRNPUL1     | Heterogeneous nuclear ribonucleoprotein U-like protein | 1.11  |

|             |                                                                                                                                                                 |      |
|-------------|-----------------------------------------------------------------------------------------------------------------------------------------------------------------|------|
|             | 1                                                                                                                                                               |      |
| EDC4        | Enhancer of mRNA-decapping protein 4                                                                                                                            | 1.11 |
| HIST1H1C    | Histone H1.2                                                                                                                                                    | 1.11 |
| PFKP        | 6-phosphofructokinase type C                                                                                                                                    | 1.11 |
| G6PD        | Glucose-6-phosphate 1-dehydrogenase                                                                                                                             | 1.11 |
| HSPA1A      | Heat shock 70 kDa protein 1A/1B                                                                                                                                 | 1.11 |
|             | BH3-interacting domain death agonist;BH3-interacting domain death agonist p15;BH3-interacting domain death agonist p13;BH3-interacting domain death agonist p11 | 1.12 |
| BID         |                                                                                                                                                                 |      |
| FUBP3       | Far upstream element-binding protein 3                                                                                                                          | 1.12 |
| ACAT2       | Acetyl-CoA acetyltransferase, cytosolic                                                                                                                         | 1.12 |
| FKBP3       | Peptidyl-prolyl cis-trans isomerase FKBP3                                                                                                                       | 1.12 |
| RPL19       | 60S ribosomal protein L19                                                                                                                                       | 1.12 |
|             | NADH dehydrogenase [ubiquinone] iron-sulfur protein 3, mitochondrial                                                                                            | 1.12 |
| NDUFS3      |                                                                                                                                                                 |      |
| MAPK1       | Mitogen-activated protein kinase 1                                                                                                                              | 1.12 |
| CHORDC1     | Cysteine and histidine-rich domain-containing protein 1                                                                                                         | 1.12 |
| GLOD4       | Glyoxalase domain-containing protein 4                                                                                                                          | 1.12 |
| PIIB        | Peptidyl-prolyl cis-trans isomerase B                                                                                                                           | 1.12 |
| DDX1        | ATP-dependent RNA helicase DDX1                                                                                                                                 | 1.12 |
| RAB2A;RAB2B | Ras-related protein Rab-2A;Ras-related protein Rab-2B                                                                                                           | 1.12 |
| NNT         | NAD(P) transhydrogenase, mitochondrial                                                                                                                          | 1.13 |
| HAT1        | Histone acetyltransferase type B catalytic subunit                                                                                                              | 1.13 |
| APRT        | Adenine phosphoribosyltransferase                                                                                                                               | 1.13 |
| ASNA1       | ATPase ASNA1                                                                                                                                                    | 1.13 |
| TKT         | Transketolase                                                                                                                                                   | 1.14 |
| CLUH        | Clustered mitochondria protein homolog                                                                                                                          | 1.14 |
|             | Band 4.1-like protein 3;Band 4.1-like protein 3, N-terminally processed                                                                                         | 1.14 |
| EPB41L3     |                                                                                                                                                                 |      |
|             | Delta(3,5)-Delta(2,4)-dienoyl-CoA isomerase, mitochondrial                                                                                                      | 1.14 |
| ECH1        |                                                                                                                                                                 |      |
| PDLIM1      | PDZ and LIM domain protein 1                                                                                                                                    | 1.14 |
| PHF6        | PHD finger protein 6                                                                                                                                            | 1.14 |
| SNRPB2      | U2 small nuclear ribonucleoprotein B                                                                                                                            | 1.14 |
|             | Mini-chromosome maintenance complex-binding protein                                                                                                             | 1.14 |
| MCMBP       |                                                                                                                                                                 |      |
| IARS        | Isoleucine--tRNA ligase, cytoplasmic                                                                                                                            | 1.15 |
| THOC3       | THO complex subunit 3                                                                                                                                           | 1.15 |
| GSTM3       | Glutathione S-transferase Mu 3                                                                                                                                  | 1.15 |
| CBR1        | Carbonyl reductase [NADPH] 1                                                                                                                                    | 1.15 |
|             | NADH dehydrogenase [ubiquinone] iron-sulfur protein 2, mitochondrial                                                                                            | 1.15 |
| NDUFS2      |                                                                                                                                                                 |      |
| TCERG1      | Transcription elongation regulator 1                                                                                                                            | 1.15 |
| PHPT1       | 14 kDa phosphohistidine phosphatase                                                                                                                             | 1.15 |
| RCN2        | Reticulocalbin-2                                                                                                                                                | 1.15 |
| NASP        | Nuclear autoantigenic sperm protein                                                                                                                             | 1.16 |
| ECI1;DCI    | Enoyl-CoA delta isomerase 1, mitochondrial                                                                                                                      | 1.16 |

|             |                                                                                                                              |      |
|-------------|------------------------------------------------------------------------------------------------------------------------------|------|
| GPD2        | Glycerol-3-phosphate dehydrogenase, mitochondrial                                                                            | 1.16 |
| MCM2        | DNA replication licensing factor MCM2                                                                                        | 1.16 |
| ALDH9A1     | 4-trimethylaminobutyraldehyde dehydrogenase                                                                                  | 1.16 |
| PCBP2;PCBP3 | Poly(rC)-binding protein 2;Poly(rC)-binding protein 3                                                                        | 1.16 |
| PSMB6       | Proteasome subunit beta type-6                                                                                               | 1.17 |
| SEC24C      | Protein transport protein Sec24C                                                                                             | 1.17 |
| DCTN1       | Dynactin subunit 1                                                                                                           | 1.17 |
|             | UDP-N-acetylhexosamine pyrophosphorylase;UDP-N-acetylglucosamine pyrophosphorylase;UDP-N-acetylglucosamine pyrophosphorylase | 1.17 |
| UAP1        | acetylglucosamine pyrophosphorylase                                                                                          |      |
| APMAP       | Adipocyte plasma membrane-associated protein                                                                                 | 1.17 |
|             | Aspartate aminotransferase, cytoplasmic;Aspartate aminotransferase                                                           | 1.17 |
| GOT1        |                                                                                                                              |      |
| MCM5        | DNA replication licensing factor MCM5                                                                                        | 1.17 |
| MCM3        | DNA replication licensing factor MCM3                                                                                        | 1.18 |
| ACO2        | Aconitate hydratase, mitochondrial                                                                                           | 1.18 |
|             | Transforming protein RhoA;Rho-related GTP-binding protein RhoC                                                               | 1.19 |
| RHOA;RHOC   |                                                                                                                              |      |
| MRTO4       | mRNA turnover protein 4 homolog                                                                                              | 1.19 |
|             | Mitochondrial import receptor subunit TOM40 homolog                                                                          | 1.19 |
| TOMM40      |                                                                                                                              |      |
| ATP6V1B2    | V-type proton ATPase subunit B, brain isoform                                                                                | 1.20 |
| ANXA6       | Annexin A6;Annexin                                                                                                           | 1.20 |
| COPS2       | COP9 signalosome complex subunit 2                                                                                           | 1.20 |
| MRI1        | Methylthioribose-1-phosphate isomerase                                                                                       | 1.20 |
| DPYSL2      | Dihydropyrimidinase-related protein 2                                                                                        | 1.21 |
| BCAP31      | B-cell receptor-associated protein 31                                                                                        | 1.21 |
| PGP         | Phosphoglycolate phosphatase                                                                                                 | 1.21 |
| KIAA1279    | KIF1-binding protein                                                                                                         | 1.21 |
| PSME1       | Proteasome activator complex subunit 1                                                                                       | 1.23 |
| CPVL        | Probable serine carboxypeptidase CPVL                                                                                        | 1.23 |
| IDE         | Insulin-degrading enzyme                                                                                                     | 1.23 |
| GPS1        | COP9 signalosome complex subunit 1                                                                                           | 1.23 |
| PGD         | 6-phosphogluconate dehydrogenase, decarboxylating                                                                            | 1.24 |
| IDH1        | Isocitrate dehydrogenase [NADP] cytoplasmic                                                                                  | 1.24 |
| PRDX2       | Peroxiredoxin-2                                                                                                              | 1.25 |
|             | Beta-hexosaminidase subunit beta;Beta-hexosaminidase subunit beta chain B;Beta-hexosaminidase subunit beta chain A           | 1.25 |
| HEXB        |                                                                                                                              |      |
| RFC2        | Replication factor C subunit 2                                                                                               | 1.27 |
| CAPNS1      | Calpain small subunit 1                                                                                                      | 1.28 |
| NEFL        | Neurofilament light polypeptide                                                                                              | 1.28 |
|             | Glutamate dehydrogenase 1, mitochondrial;Glutamate dehydrogenase;Glutamate dehydrogenase 2, mitochondrial                    | 1.29 |
| GLUD1;GLUD2 |                                                                                                                              |      |
| TPP2        | Tripeptidyl-peptidase 2                                                                                                      | 1.30 |
| APEH        | Acylamino-acid-releasing enzyme                                                                                              | 1.30 |
| MRPS22      | 28S ribosomal protein S22, mitochondrial                                                                                     | 1.30 |

|       |                                    |      |
|-------|------------------------------------|------|
| BPNT1 | 3(2),5-bisphosphate nucleotidase 1 | 1.32 |
| CUL4B | Cullin-4B                          | 1.36 |
| COMT  | Catechol O-methyltransferase       | 1.43 |
| BLVRA | Biliverdin reductase A             | 1.68 |

*De novo* translated proteins with expression changes +/- 10% within 24 h in *circANRIL* overexpressing relative to control cells (n=197) are listed.

**Supplementary Table 5** Upstream regulator analysis of differentially *de novo* translated proteins in *circANRIL* overexpressing and vector control HEK-293 cells.

| <b>Transcription regulator</b> | <b>p-value</b>        |
|--------------------------------|-----------------------|
| HNF4A                          | $2.43 \times 10^{-8}$ |
| MYC                            | $3.19 \times 10^{-8}$ |
| TP53                           | $3.45 \times 10^{-7}$ |
| NFE2L2                         | $8.14 \times 10^{-7}$ |
| KDM5B                          | $4.84 \times 10^{-6}$ |
| E2F1                           | $1.15 \times 10^{-5}$ |
| E2F4                           | $8.11 \times 10^{-5}$ |
| MYCN                           | $1.67 \times 10^{-4}$ |

*De novo* translated proteins with expression changes +/- 10% within 24 h in *circANRIL* overexpressing relative to control cells (n=197) were included in the analysis.

**Supplementary Table 6** Upstream regulator analysis of differentially regulated genes in *circANRIL* overexpressing and vector control HEK-293 cells.

| <b>Transcription regulator</b> | <b>p-value</b>         |
|--------------------------------|------------------------|
| TP53                           | $8.53 \times 10^{-16}$ |
| MYC                            | $8.27 \times 10^{-09}$ |
| NUPR1                          | $2.67 \times 10^{-08}$ |
| TP63                           | $1.35 \times 10^{-07}$ |
| E2F1                           | $5.23 \times 10^{-07}$ |
| HNF4A                          | $6.11 \times 10^{-07}$ |
| HIF1A                          | $9.38 \times 10^{-07}$ |
| EPAS1                          | $1.40 \times 10^{-05}$ |

Genes with expression fold changes of  $< 0.5$  and  $> 2$  in *circANRIL* overexpressing cell lines (n=3; n= 1809) compared to vector control cell lines (n=3) were included in the analysis.

**Supplementary Table 7** Sequence alignment of *circANRIL* and precursor S45S5 rRNA (NM\_046235) using the BLASTn algorithm.

| <b>Motif</b> | <b>Sequence alignment</b> |       |                                |       | <b>bp (circANRIL)</b> |
|--------------|---------------------------|-------|--------------------------------|-------|-----------------------|
| M1           | circANRIL                 | 81    | CAGATATATGTTATCTGTGCTT         | 102   | 81-102                |
|              |                           |       |                                |       |                       |
|              | RNA45S5                   | 12545 | CAGACATTTGGTGTATGTGCTT         | 12566 |                       |
| M2           | circANRIL                 | 144   | AAGAGAGGGTTCAAG                | 158   | 144-158               |
|              |                           |       |                                |       |                       |
|              | RNA45S5                   | 8319  | AAGAGAGAGTTCAAG                | 8333  |                       |
| M3           | circANRIL                 | 276   | GAGACGGGGTTTTACCATGTTGGCCAGAC  | 304   | 276-304               |
|              |                           |       |                                |       |                       |
|              | RNA45S5                   | 6509  | GAGAGGGGGTTGCCTCAGGCCGGCCAGAC  | 6481  |                       |
| M4           | circANRIL                 | 332   | CGCCCGCCTCGGCCTCCCAAAGTGCTGGGA | 361   | 332-361               |
|              |                           |       |                                |       |                       |
|              | RNA45S5                   | 1713  | CGCCGGCCGCGCGTCCCAACCCGCTGGGA  | 1684  |                       |
| M5           | circANRIL                 | 381   | CGCCGGCGGATAGAGA               | 397   | 381-397               |
|              |                           |       |                                |       |                       |
|              | RNA45S5                   | 6965  | CGCCGGCTGAGAGAGA               | 6981  |                       |

**Supplementary Table 8.** Plasmid sequences for PES1 wildtype (PES1-WT), PES1 $\Delta$ 1-54 and PES1 $\Delta$ 446-588 overexpression.

*>PES1-WT, 1790 bp exonic sequence*

GCATCCGTCGCCACCATGGGAGGCCCTTGAGAAGAAGAAGTATGAACGAGGCTCGGCCACCAACTACATCA  
CCCCGAAACAAAGCCCCGGAAGAAGCTCCAGCTGAGCTTGGCTGACTTTAGGCGGCTGTGCATTTCTGAAGGG  
CATTTATCCCCATGAACCCAAACACAAGAAGAAGGTTAAACAAGGGTTCACAGCAGCCCCGAACGTTTTTAC  
CTTATCAAAGACATCAGGTTTTCTCCTCCACGAACCCATTGTCAACAAGTTCGGTGAATACAAGGTGTTTCG  
TCCGGAAGCTCCGGAAGGCTTATGGGAAGAGCGAGTGGAACTGTAGAGCGTTTAAAGGACAATAAGCC  
CAACTACAAACTCGACCACATCATCAAGGAACGGTATCCCACGTTTCATCGATGCCCTGCGGGACCTGGAC  
GATGCCCTCTCCATGTGCTTCCGTGTTTTCCACCTTCCCGCGACTGGCAAGTGCCACGTGCAGACCATT  
AGCTGTGCCGCCGGCTCACTGTGGAGTTCATGCACTACATTTATCGCTGCCCGTGCCCTGCGCAAGGCTTT  
CCTGTCCATCAAAGGCATTTACTACCAGGCCGAGGTACTGGGGCAGCCCATCGTGTGGATCACTCCCTAT  
GCCTTCTCCCATGACCACCCGACAGACGTGGACTACAGGGTCATGGCCACCTTCACCGAGTTCTACACCA  
CGCTGCTGGGCTTTGTCAACTTCCGCCCTTACCAGTTGCTCAACCTCCACTATCCCCGAAGCTCGAGGG  
TCAGGCCCAAGCAGAGGCAAAGGCCGGTGGGGCACCTACGCGTTGGACTCCGAGAGTTGTATGGAGAAA  
CTGGCAGCCCTCAGTGCCAGCCTGGCCCCGCTGGTGGTGCCTGCCACAGAGGAGGAGGCCGAGGTGGATG  
AGTTTCCCACCGATGGGGAGATGTCAGCGCAGGAGGAAGACCGCAGGAAGGAGCTGGAGGCCGAGGAGAA  
GCACAAGAAGCTTTTTGAGGGCCTGAAGTCTTCTTCCGAGAGGTGCCCGTGAGGCCCTGACCTGACGTC  
ATCATCAGGAGTTTTGGTGGGGAAGTGTCTGGGACAAATCTTTGTGCATTTGGGGCCACCTATGACGTC  
CAGACTCCCGCATCACCCATCAGATTGTCTGACCCGGCTGGGCAGCAGACCTCAGTCAATTGGCAGGTGCTA  
CGTGCAGCCCCAGTGGGTGTTTACTCAGTGAACGCCAGGCTCCTTCTCCCCGTGGCAGAGTACTTCTCT  
GGGGTGCAGCTGCCCCACACCTTTCACCTTGTGACCGAGAAGGAAGGAGATTACGTTCCACCTGAGA  
AGCTGAAGCTGCTGGCTGTCAGCGGGGAGAGGACCCAGGAACTGAATGAGTCAGAAGAGGAGGAGGA  
AGAGGACGACAACAACGAAGGTGATGGTGAAGAGGGAGAAAATGAGGAGGAGGAGGAAGATGCAGAG  
GCTGGTTTCAGAAAAGGAGGAAGAGGCCCGGCTGGCAGCCCTGGAAGAGCAGAGGATGGAGGGGAAGAAGC  
CCAGGGTGAAGGAGGACCTTGAAGCTGGAGGATAAGCAGCGGCTGGCCCAGGAGGAGGAGAGTGGAGG  
CAAGCGCTGGCCATTATGATGATGAAGAAGCGGAGAAAGTACCTGTACCAGAAGATCATGTTTGGCAAG  
AGGCGAAAATCCGAGAGGCCAACAAGCTGGCGGAGAACGGAAAGCCACGATGAGGCGGTGAGGCTG  
AGAAGAAGGCCAAGAAGGCAAGGCCGAGGGGGGCCACCGTCTGACCGGCCG

*>PES1 $\Delta$ 1-54, 1605 bp exonic sequence*

GCATCCGTCGCCACCATGAACAAGGGTTCACAGCAGCCCCGAACGTTTTTACCTTATCAAAGACATCAGGT  
TTCTCCTCCACGAACCCATTGTCAACAAGTTCGGTGAATACAAGGTGTTTCGTCGGAAGCTCCGGAAGGC  
TTATGGGAAGAGCGAGTGGAACTGTAGAGCGTTTAAAGGACAATAAGCCCAACTACAAACTCGACCAC  
ATCATCAAGGAACGGTATCCCACGTTTCATCGATGCCCTGCGGGACCTGGACGATGCCCTCTCCATGTGCT  
TCCTGTTTTCCACCTTCCCGCGACTGGCAAGTGCCACGTGCAGACCATTACGCTGTGCCGCCGGCTCAC  
TGTGGAGTTTCATGCATACATTTATCGCTGCCCGTGCCCTGCGCAAGGCTTCTCCTGTCCATCAAAGGCA  
TACTACCAGGCCAGGTACTGGGGCAGCCATCGTGTGGATCACTCCCTATGCCCTTCTCCCATGACCACC  
CGACAGACGTGGACTACAGGGTTCATGGCCACCTTACCAGTTCTACACCACGCTGCTGGGCTTTGTCAA  
CTTCCGCCCTTACCAGTTGCTCAACCTCCACTATCCCCGAAGCTCGAGGGTCAAGGCCAAGCAGAGGCA  
AAGGCCGGTGGAGGCCACTACGCGTTGGACTCCGAGAGTTGTATGGAGAACTGGCAGCCCTCAGTGCCA  
GCCTGGCCCCGCTGGTGGTGCCTGCCACAGAGGAGGAGGCCGAGGTGGATGAGTTTCCCACCGATGGGGA  
GATGTCAGCGCAGGAGGAAGACCGCAGGAAGGAGCTGGAGGCCGAGGAGAAGCACAAGAAGCTTTTTGAG  
GGCTGAAGTTCTTCCGAGAGGTTGCCCGTGAGGCCCTGGCCTTTCATCATCAGGAGTTTTTGGT  
GGGAAGTGTCTGGGACAAATCTTTGTGCATTTGGGGCCACCTATGACGTCACAGACTCCCGCATCACCCA  
TCAGATTGTGACCGGCTGGGCAGCAGACCTCAGTCAATTGGCAGGTGCTACGTGCAGCCCCAGTGGGTG  
TTTGACTCAGTGAACGCCAGGCTCCTTCTCCCCGTGGCAGAGTACTTCTCTGGGGTGCAGCTGCCCCAC  
ACCTTTCACCTTTGTGACCGAGAAGGAAGGAGATTACGTTCCACCTGAGAAGCTGAAGCTGCTGGCTCT  
GCAGCGGGGAGAGGACCCAGGAACTGAATGAGTCAGAAGAGGAGGAGGAAGAGGACGACAACAACGAA  
GGTGAATGGTGAAGAGGGAGAAAATGAGGAGGAGGAGGAAGATGCAGAGGCTGGTTTCAGAAAAGGAGG  
AAGAGGCCCGGCTGGCAGCCCTGGAAGAGCAGAGGATGGAGGGGAAGAAGCCAGGGTGAATGGCAGGCAC  
CTTGAAGCTGGAGGATAAGCAGCGGCTGGCCCAGGAGGAGGAGTGGAGGCCAAGCGCTGGCCATTATG  
ATGATGAAGAAGCGGAGAAAGTACCTGTACCAGAAGATCATGTTTGGCAAGAGGCGAAAATCCGAGAGG  
CCAACAAGCTGGCGGAGAACGGAAAGCCACGATGAGGCGGTGAGGCTGAGAAAGAAGGCCAAGAAGGC  
AAGGCCGAGGGGGGCCACCGTCTGACCGGCCG



---

>PES1 $\Delta$ 446-588, 1335 bp exonic sequence

---

GGATCCGTCGCCACCATGGGAGGCCCTTGAGAAGAAGAAGTATGAACGAGGCTCGGCCACCAACTACATCAC  
CCGGAACAAAGCCCGGAAGAAGCTCCAGCTGAGCTTGGCTGACTTTAGGCGGCTGTGCATTCTGAAGGGCA  
TTTATCCCCATGAACCCAAACACAAGAAGAAGGTTAACAAAGGGTTCTACAGCAGCCCGAACGTTTTACCTT  
ATCAAAGACATCAGGTTTCTCCTCCACGAACCCATTGTCAACAAGTTCCGTGAATACAAGGTGTTTCGTCCG  
GAAGTCCCGAAGGCTTATGGGAAGAGCGAGTGGAACTGTAGAGCGTTTAAAGGACAATAAGCCCAACT  
ACAACTCGACCACATCATCAAGGAACGGTATCCCACGTTTCATCGATGCCCTGCGGGACCTGGACGATGCC  
CTCTCCATGTGCTTCCGTGTTTTCCACCTTCCCGCGACTGGCAAGTGCCACGTGCAGACCATTCAGCTGTG  
CCGCCGGCTCACTGTGGAGTTCATGCACTACATTATCGCTGCCCGTGCCCTGCGCAAGGTCTTCTGTCCA  
TCAAAGGCATTTACTACCAGGCCGAGGTACTGGGGCAGCCCATCGTGTGGATCACTCCCTATGCCTTCTCC  
CATGACCACCCGACAGACGTGGACTACAGGGTTCATGGCCACCTTCACCGAGTTCACACCACGCTGCTGGG  
CTTTGTCAACTTCCGCCTTTACCAGTTGCTCAACCTCCACTATCCCCCGAAGCTCGAGGGTCAGGCCCAAG  
CAGAGGCAAAGGCCGGTGAAGGCACCTACGCGTTGGACTCCGAGAGTTGTATGGAGAACTGGCAGCCCTC  
AGTGCCAGCCTGGCCCGCTGGTGGTGCCTGCCACAGAGGAGGAGCCGAGGTGGATGAGTTTCCACCGA  
TGGGGAGATGTCAGCGCAGGAGGAAGACCGCAGGAAGGAGCTGGAGGCGCAGGAGAAGCACAAGAAGCTTT  
TTGAGGGCCTGAAGTTCTTCTTGAACCGAGAGGTGCCCGTGAGGCCCTGGCCTTCATCATCAGGAGTTTT  
GGTGGGAAGTGTCTGGGACAAATCTTTGTGCATTGGGGCCACCTATGACGTCACAGACTCCCGCATCAC  
CCATCAGATTGTGACCGGCCCTGGGCAGCAGACCTCAGTCATTGGCAGGTGCTACGTGCAGCCCCAGTGGG  
TGTTTGACTCAGTGAACGCCAGGCTCCTTCTCCCGTGGCAGAGTACTTCTCTGGGGTGCAGCTGCCCCCA  
CACCTTTCACCCTTTGTGACCGAGAAGGAAGGAGATTACGTTCCACCTGAGAAGCTGAAGCTGCTGGCTCT  
GGGGGGGCCACCGGTCTGAGCGGCCG

---

DNA sequences for overexpression of PES1 wildtype (PES1-WT) and truncated PES1 (PES1 $\square$ 1-54 and PES1 $\square$ 446-588, respectively) were cloned in the pmCherry-N1 vector (Clontech). GGATCC (dark blue)- BamHI restriction site, ACCGGT (grey) – AgeI restriction site, GCGGCCGC (light blue)- NotI restriction site, ACGTACGT - exonic sequence, ACGTACGT- tag-linking sequence.

**Supplementary Table 9** Primers and probes for PCR and qPCR.

| Transcript/<br>NM number                  | Primer/<br>probe | Sequence                                    |
|-------------------------------------------|------------------|---------------------------------------------|
| <i>circANRIL (ex7-5)</i>                  | 5'-primer        | 5'-GCTGGGATTACAGGTGTGAGACACC-3'             |
|                                           | 3'-primer        | 5'-GAATCAGAATGAGGCTTATTCTTCTCATC-3'         |
|                                           | probe            | 5'-F-CCCGGCGGATAGAGAGAATTTTGACAGTGTC-3'T    |
| <i>lin+circANRIL (ex6-7)</i>              | 5'-primer        | 5'-GGGAGATCTATTTGGAATGTATCTAACTCC-3'        |
|                                           | 3'-primer        | 5'-GAGAGTTCAAGACCAGTCTGGCC-3'               |
|                                           | probe            | 5'-F-CCATCAGAGGTAACAGTAGAGACGGGGTTTCACC-3'T |
| <i>circHPRT1 (ex6-2)</i><br>NM_000194     | 5'-primer        | 5'-GGTCAGGCAGTATAATCCAAAGATGG-3'            |
|                                           | 3'-primer        | 5'-CAAATCCTCAGCATAATGATTAGGTATGC-3'         |
|                                           | probe            | 5'-F-CAAGGTCGCAAGATTAGTGATGATGAACCAGG-3'T   |
| <i>lin+circHPRT1 (ex2-3)</i><br>NM_000194 | 5'-primer        | 5'-GGAAAGGGTGTTTATTCCTCATGG-3'              |
|                                           | 3'-primer        | 5'-GGCCTCCCATCTCCTTCATCA-3'                 |
|                                           | probe            | 5'-F-TGGACAGGACTGAACGTCTTGCTCGAGAT-3'T      |
| <i>PES1</i><br>NM_014303                  | 5'-primer        | 5'-GAGTTCATGCACTACATTATCGCTGC-3'            |
|                                           | 3'-primer        | 5'-CTGCCCCAGTACCTCGGCC-3'                   |
|                                           | probe            | 5'-F-TGCCCTGCGCAAGGTCTTCCTGTC-3'T           |
| <i>SOX2</i><br>NM_003106                  | 5'-primer        | 5'-CCAGCGCATGGACAGTTACG-3'                  |
|                                           | 3'-primer        | 5'-CTGGTCCTGCATCATGCTGTAG-3'                |
|                                           | probe            | 5'-F-TGAACGGCTGGAGCAACGGCA-3'T              |
| <i>cMAF</i><br>NM_005360                  | 5'-primer        | 5'-CAGCGACAACCCGTCCTCTC-3'                  |
|                                           | 3'-primer        | 5'-GGCTTCCAAAATGTGGCGTAT-3'                 |
|                                           | probe            | 5'-F-TAACTGAGCCCACTCGCAAGTTGGAGC-3'T        |

probes: 5'F-= 5'FAMRA-; -3'T = -3'TAMRA

**Supplementary Table 10** gRNA sequences and PCR primers for validation.

| <b>Name</b>                  | <b>gRNA/<br/>primer</b> | <b>Sequence</b>                   |
|------------------------------|-------------------------|-----------------------------------|
| gRNA 5' <i>ANRIL</i> exon 5  | gRNA                    | 5'-GCAGAGAAATACATTGAATA-3'        |
| gRNA 3' <i>ANRIL</i> exon 20 | gRNA                    | 5'-GTTAGTTTGGTTGAGGTAAG-3'        |
| Ex1 PCR                      | 5'-primer               | 5'-CGCGGATTCTGGTGCTGCTC-3'        |
|                              | 3'-primer               | 5'-GTCCAGATGTCGCGTCAGAGG-3'       |
| Ex7 PCR                      | 5'-primer               | 5'-CAGACTGGTCTTGA ACTCTCGACCTC-3' |
|                              | 3'-primer               | 5'-GCATTCAGGCCAAGGAAGAGAAG-3'     |
| Ex5-20 PCR                   | 5'-primer               | 5'-GGCAGGAGGATCTGGGGCATATG-3'     |
|                              | 3'-primer               | 5'-GAGCAAAGCATCAGGATCCTTAAAAG-3'  |

**Supplementary Table 11** Antibodies for Western blotting (WB), native gel electrophoresis (NG), RNA-immunoprecipitation (RIP), immunofluorescent (IF) stainings and secondary antibodies.

| <b>Antibody</b>                 | <b>Supplier</b>     | <b>Catalogue number</b> | <b>Primary/secondary antibody</b> | <b>Host</b> | <b>Mono-/poly-clonal</b> | <b>WB</b> | <b>NG</b> | <b>RIP</b> | <b>IF</b> |
|---------------------------------|---------------------|-------------------------|-----------------------------------|-------------|--------------------------|-----------|-----------|------------|-----------|
| GAPDH                           | Fitzgerald          | 10R-G109a               | p                                 | mouse       | m                        | +         |           |            |           |
| LAMIN B2                        | Santa Cruz          | sc-377379               | p                                 | mouse       | m                        | +         |           |            |           |
| PES1                            | Abcam               | ab72539                 | p                                 | rabbit      | p                        | +         | +         |            | +         |
| PES1                            | Santa Cruz          | sc-166300               | p                                 | mouse       | m                        | +         |           |            |           |
| TP53 (p53)                      | Abcam               | ab26                    | p                                 | mouse       | m                        | +         |           |            |           |
| AGO2                            | Thermo Scientific   | MA5-14861               | p                                 | rabbit      | m                        |           |           | +          |           |
| BOP1                            | Santa Cruz          | sc-390672               | p                                 | mouse       | m                        | +         | +         | +          | +         |
| BRIX1                           | Santa Cruz          | sc-373680               | p                                 | mouse       | m                        |           |           | +          |           |
| NOLC1                           | Santa Cruz          | sc-374033               | p                                 | mouse       | m                        |           |           | +          |           |
| NOP14                           | Abnova              | H00008602-B01P          | p                                 | mouse       | p                        |           |           | +          |           |
| PES1                            | Santa Cruz          | sc-166300               | p                                 | mouse       | m                        |           |           | +          |           |
| TP53 (p53)                      | Abcam               | ab90363                 | p                                 | mouse       | m                        |           |           |            | +         |
| Peroxidase labelled anti-mouse  | Vektor Laboratories | PI-2000                 | s                                 | horse       | p                        | +         |           |            |           |
| Peroxidase labelled anti-rabbit | Vektor Laboratories | PI-1000                 | s                                 | goat        | p                        | +         |           |            |           |
| Alexa Fluor 568 anti-rabbit     | Life Technologies   | A-11036                 | s                                 | goat        | p                        |           |           |            | +         |
| Alexa Fluor 568 anti-mouse      | Life Technologies   | A-11031                 | s                                 | goat        | p                        |           |           |            | +         |
